# Supplementary material for: Carbon-coated MoO2 nanoclusters anchored on RGO sheets as high-performance electrodes for symmetric supercapacitors
Source: Royal Society of Chemistry journal article supplement (doi:10.1039/c8dt03665a), 2018-11-19
Supplement: c8dt03665a1.pdf [file c8dt03665a1.pdf]

## Supplementary Material

# Carbon-coated MoO<sub>2</sub> Nanoclusters Anchored on RGO Sheets as High Performance Electrodes for Symmetric Supercapacitors

Haochen Si, Li Sun,\* Yu Zhang, Yuanxing Zhang, Liqi Bai and Yihe Zhang\*

*Beijing Key Laboratory of Materials Utilization of Nonmetallic Minerals and Solid Wastes, National Laboratory of Mineral Materials, School of Materials Science and Technology, China University of Geosciences, Beijing, 100083, PR China*

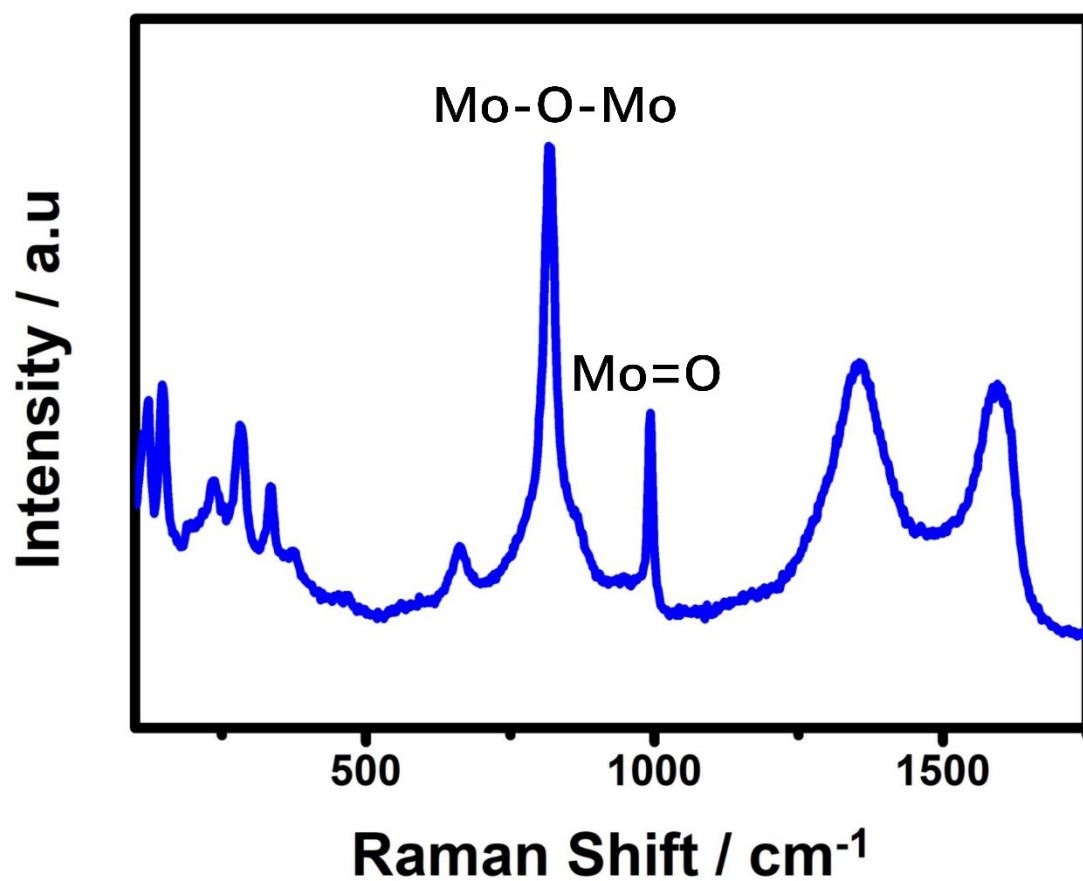

**Figure S1.** Raman spectrum of RGO@MoO<sub>2</sub>/C.

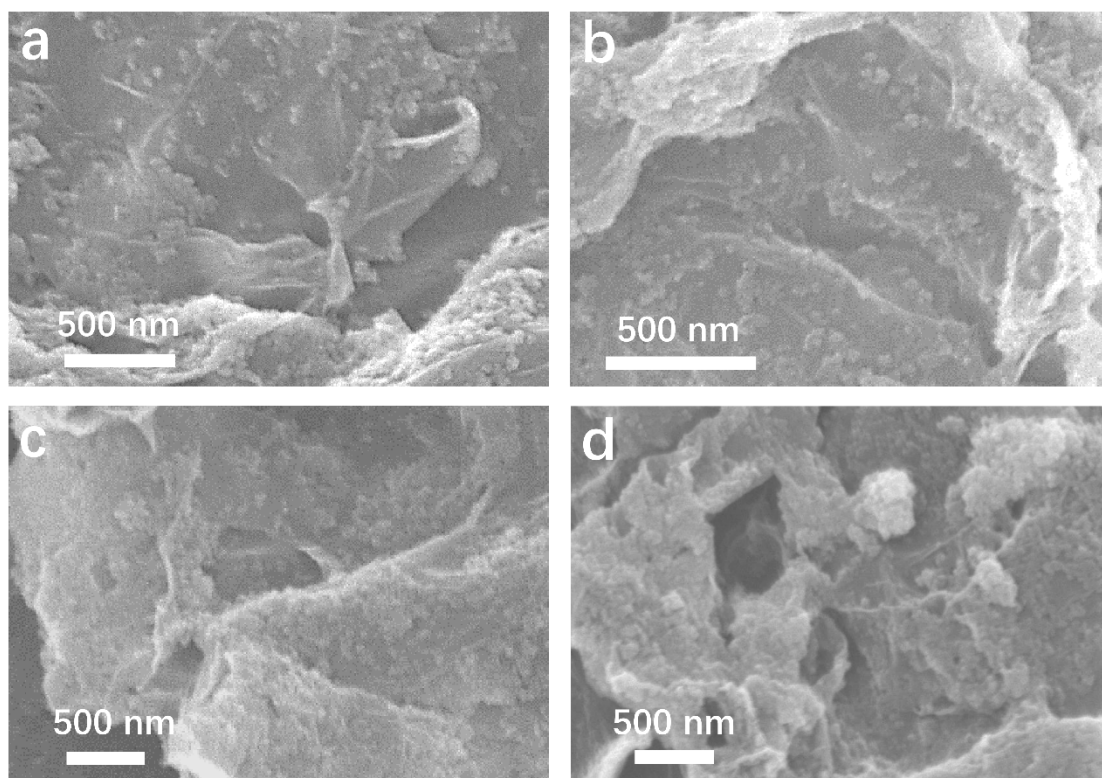

**Figure S2.** SEM images of RGO@MoO<sub>2</sub>/C composites with different GO mass ratios: (a) 15 wt% GO, (b) 10 wt% GO, (c) 5 wt% GO and (d) 2.5 wt% GO.

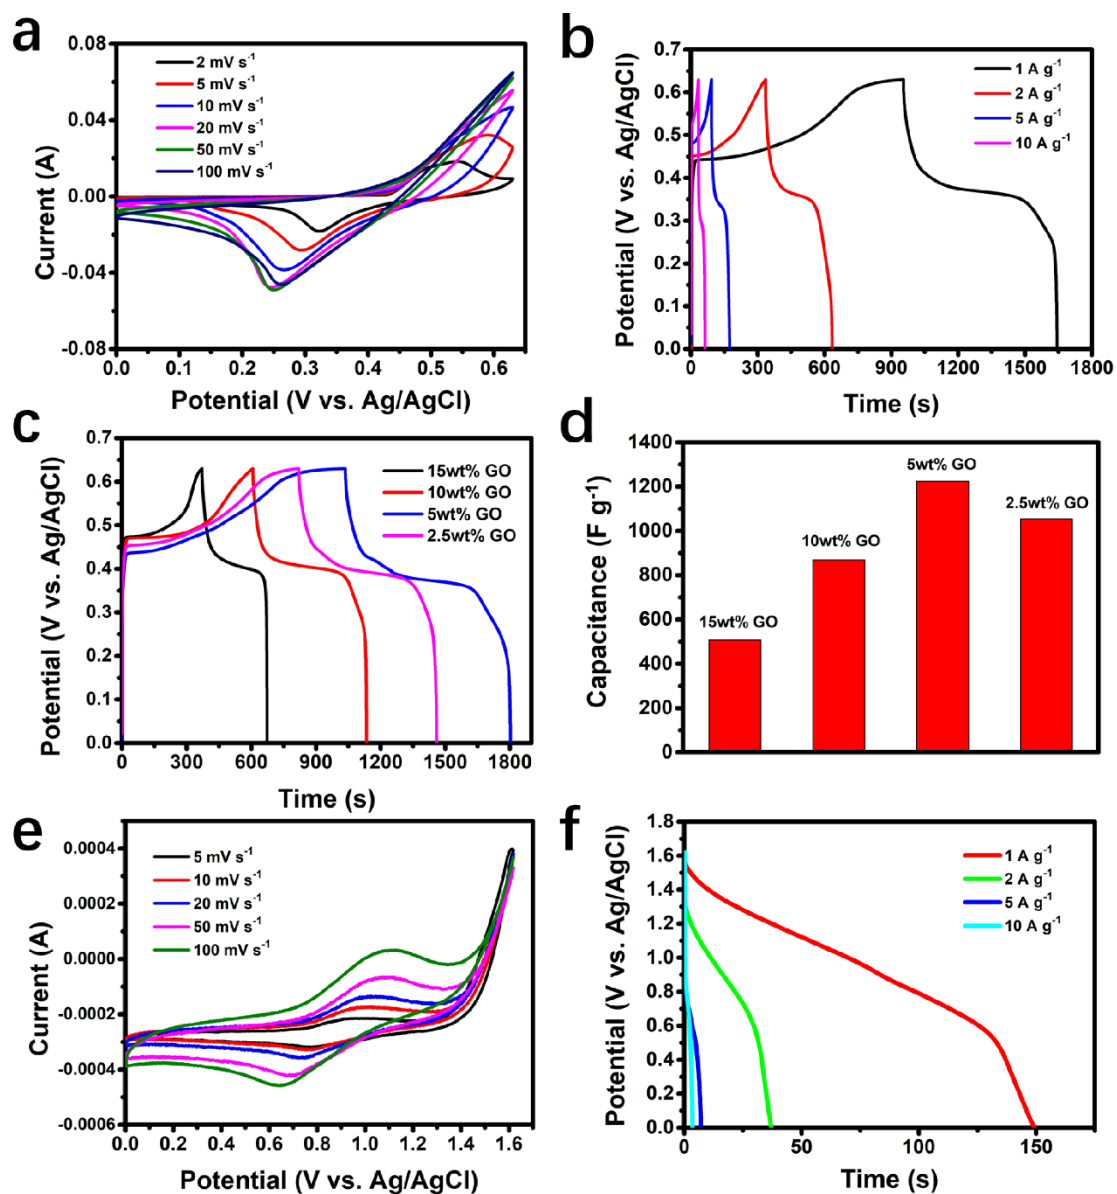

**Figure S3.** (a) CV curves and (b) CD curves of  $\text{MoO}_2/\text{C}$ . (c) CD curves ( $1 \text{ A g}^{-1}$ ) of  $\text{RGO}@\text{MoO}_2/\text{C}$  composites with different mass ratio and their (d) calculated specific capacitance. (e) CV curves and (f) discharging curves of the ASC.

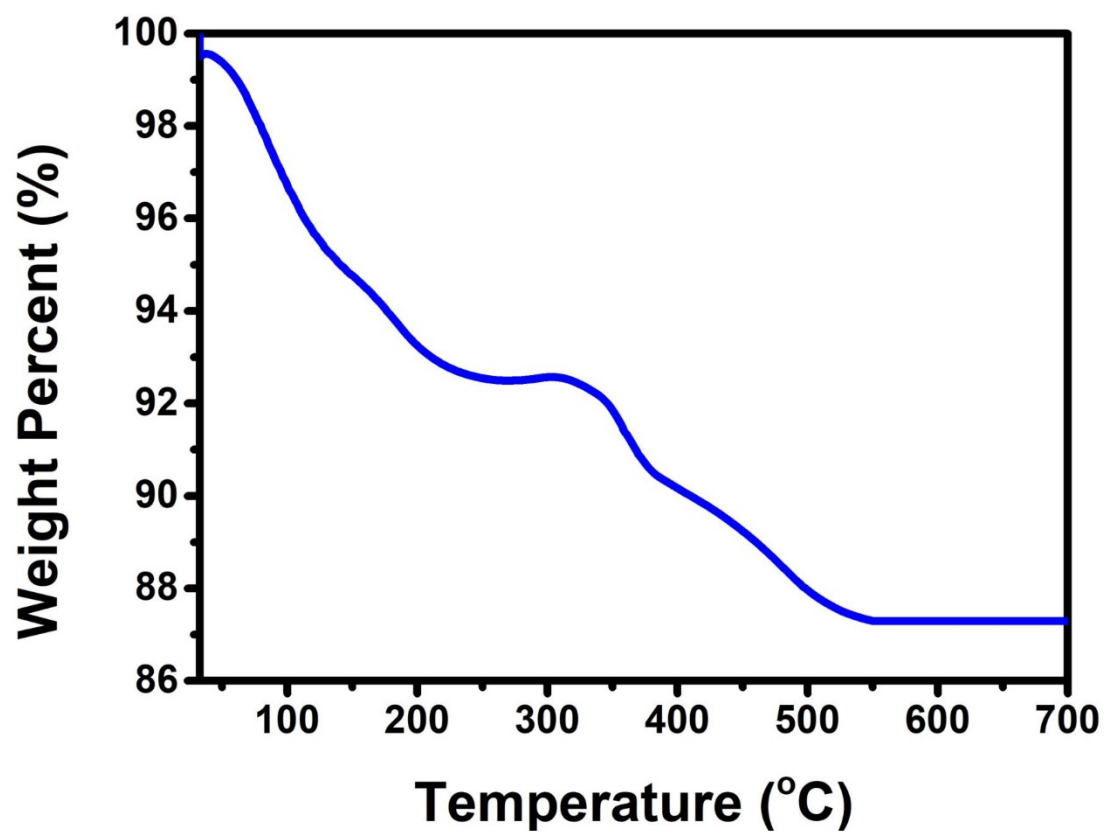

Figure S4. TGA curve of RGO@MoO<sub>2</sub>/C.

**Table S1.** Comparison of the electrochemical performance in previously reported MoO<sub>2</sub> electrodes for supercapacitors.

| Electrode materials                        | Electrolyte                       | Initial capacitance                                 | Capacitance retention                             | Reference |
|--------------------------------------------|-----------------------------------|-----------------------------------------------------|---------------------------------------------------|-----------|
| RGO@MoO <sub>2</sub> /C                    | 3M KOH                            | 1224.45 F g <sup>-1</sup><br>(1 A g <sup>-1</sup> ) | 92% after 3000 cycles<br>(5 A g <sup>-1</sup> )   | This work |
| MoO <sub>2</sub> nanoparticles             | 3M KOH                            | 621 F g <sup>-1</sup><br>(1 A g <sup>-1</sup> )     | 90% after 1000 cycles<br>(1 A g <sup>-1</sup> )   | 22        |
| One-dimensional MoO <sub>2</sub> nanorods  | 1M H <sub>2</sub> SO <sub>4</sub> | 140 F g <sup>-1</sup><br>(1 A g <sup>-1</sup> )     | —                                                 | 25        |
| MoO <sub>2</sub> /CNTs                     | 3M KOH                            | 424.7 F g <sup>-1</sup><br>(1 A g <sup>-1</sup> )   | 92.8% after 3000 cycles<br>(5 A g <sup>-1</sup> ) | 35        |
| Ordered Mesoporous Carbon/MoO <sub>2</sub> | 1M H <sub>2</sub> SO <sub>4</sub> | 395 F g <sup>-1</sup><br>(1 A g <sup>-1</sup> )     | 90% after 3000 cycles<br>(5 A g <sup>-1</sup> )   | 38        |
| MoO <sub>2</sub> /RGO                      | 1M H <sub>2</sub> SO <sub>4</sub> | 434 F g <sup>-1</sup><br>(1 A g <sup>-1</sup> )     | 90% after 1000 cycles<br>(20A g <sup>-1</sup> )   | 39        |
